# Supplementary material
Source: ML conference proceedings conference paper supplement (https://proceedings.neurips.cc/paper_files/paper/2023/hash/91b047c5f5bd41ef56bfaf4ad0bd19e3-Abstract.html)
Supplement: Supplementary file 1 [file 91b047c5f5bd41ef56bfaf4ad0bd19e3-Supplemental-Conference.pdf]

---

# Appendix: Pairwise Causality Guided Transformers for Event Sequences

---

Anonymous Author(s)

Affiliation

Address

email

## 1 Synthetic Generators

We generated datasets from Binary Summary Markov Models (SuMM) where the generating dynamics is characterized by the instantiation of binary parental states for a specific look-back window [1]. We describe the parameters used in our experiments to generate four temporal event datasets namely synth-1, synth-2, synth-3, synth-4 over labels A,B,C,D and E in our paper. The graphs are shown in Figure 1. In summary, BSuMM-1 generates synth-1 and synth-2; and BSuMM-2 generates synth-3 and synth-4 respectively.

The parameters for BSuMM-1 are the following probabilities:  $p_A = \{B = 0 : 0.2, B = 1 : 0.6\}$   $p_B = \{B = 0 : 0.6, B = 1 : 0.2\}$   $p_C = 0.15$ ,  $p_D = 0.025$ ,  $p_E = 0.025$ , respectively. In synth-1, we use a window of 2 and in synth-2, we use a window of 4. The window determines the binary instantiation of the parental states for a particular event type. For example, in synth-1, for event A, if an event of B is observed in the previous window of 2, the probability of observing A for the current position is 0.6 otherwise it is 0.2. Noting the probabilities of all events sum up to 1, at each position, we generate an event from a categorical distribution. Similarly the parameters for BSuMM-2 are the following probabilities:  $p_A = \{(B = 0, C = 0) : 0.6, (B = 0, C = 1) : 0.2, (B = 1, C = 0) : 0.7, (B = 1, C = 1) : 0.4\}$   $p_B = \{(B = 0, C = 0) : 0.2, (B = 0, C = 1) : 0.6, (B = 1, C = 0) : 0.1, (B = 1, C = 1) : 0.4\}$   $p_C = 0.15$ ,  $p_D = 0.025$  and  $p_E = 0.025$  respectively. In synth-3, we use a window of 2 and in synth-4, we use a window of 4.

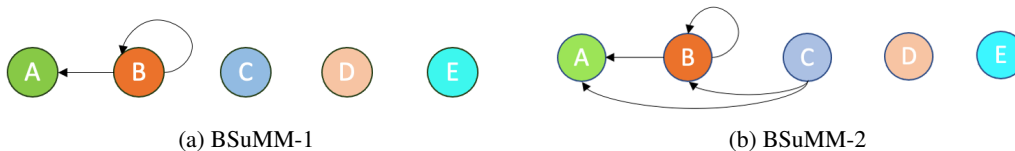

Figure 1: Two BSuMM graphs are used to generated the four synthetic datasets: BSuMM-1 generates synth-1 and synth-2; and BSuMM-2 generates synth-3 and synth-4 respectively.

## 2 Real Application Dataset Details

The 5 real-world applications cover various domains. A descriptive summary of the 5 datasets used in our experiment are given in Table 1. Further details about the curation of Beigebooks, Diabetes and LinkedIn follow [1]. The Defi dataset provides user-level cryptocurrency trading history under a specific protocol called Aave. The original curated dataset from early work [2] includes timestamp, transaction type and coin type for each transaction. To ensure relevance and applicable to our temporal event sequence, we remove unnecessary features for our study, specifically timestamp and

26 coin type, and thus resulting in a dataset that contains only sequences of events of the following  
 27 transaction types: borrow, repay, deposit, redeem, liquidation and swap.

| Dataset                       | $M$ | $K$  | $N$   |
|-------------------------------|-----|------|-------|
| BeigeBooks                    | 15  | 260  | 2370  |
| Diabetes                      | 13  | 65   | 20210 |
| LinkedIn                      | 10  | 1000 | 2212  |
| Defi                          | 6   | 500  | 17258 |
| LLM-Generated Event Sequences | 50  | 243  | 1398  |

Table 1: Dataset summary: # of event labels ( $M$ ), # of sequences ( $K$ ) and # of events ( $N$ ).

### 28 3 Model Implementation and Training

29 Our implementation of PC-TES model is based on the code adaptation from [3], and can be found  
 30 in the Supplementary Material. We transformed the original temporal point process model, known  
 31 as the Transformer Hawkes Process, into a vanilla Transformer for Event Sequence (TES) model  
 32 by replacing the temporal encoding with position encoding. In addition, similar to natural language  
 33 understanding tasks, we minimize the negative log-likelihood of event sequences (event token) for  
 34 TES (details in Section 5). We incorporate loss terms associated with incompatibility to generalize  
 35 to our PC-TES model.

36 To train our model, we utilize stochastic gradient descent and employ the Adam optimizer for opti-  
 37 mization. The default transformer architecture used for training is specified as follows: the number  
 38 of layers in the multi-headed self-attention module (n\_layer), the dimension of the value vector  
 39 after attention (d\_model), the number of attention heads (n\_head), the hidden layer size of the feed-  
 40 forward neural network (d\_inner), the dimension of the value vector (d\_v), the dimension of the key  
 41 vector (d\_k), and the dropout rate.

42 Experimental parameters for all datasets are provided in Table 2, which correspond to the results  
 43 obtained during our experiments. It is important to note that the final parameters were selected  
 44 based on the best performance of the model, determined by the minimum loss on the dev subset  
 45 during evaluation. All experiments were conducted on a private server equipped with a TITAN RTX  
 46 GPU.

Table 2: Hyperparameters for PC-TES for all datasets in the experiments. Synth represents all datasets gener-  
 ated by BSumM, namely synth-1, synth-2, synth-3, synth-4

| Parameter     | Value | Synth  | Beigebooks | Diabetes | LinkedIn | Defi   | LLM-generated event sequences |
|---------------|-------|--------|------------|----------|----------|--------|-------------------------------|
| batch_size    |       | 32     | 32         | 16       | 32       | 16     | 32                            |
| n_head        |       | 4      | 4          | 6        | 4        | 6      | 4                             |
| n_layers      |       | 4      | 4          | 6        | 4        | 6      | 4                             |
| d_model       |       | 64     | 128        | 128      | 64       | 128    | 256                           |
| d_inner       |       | 128    | 256        | 256      | 128      | 256    | 512                           |
| d_v           |       | 64     | 256        | 128      | 64       | 128    | 256                           |
| d_k           |       | 64     | 256        | 128      | 64       | 128    | 256                           |
| dropout       |       | 0.1    | 0.1        | 0.1      | 0.1      | 0.1    | 0.1                           |
| epoch         |       | 500    | 500        | 500      | 500      | 500    | 500                           |
| learning_rate |       | 0.0006 | 0.0002     | 0.0006   | 0.0004   | 0.0006 | 0.0001                        |
| $\alpha$      |       | 10     | 0.001      | 1        | 0.001    | 0.1    | 0.001                         |

### 47 4 Baseline Model Implementation Details

48 We provide details about the implementation of the baseline models.

49 **k-th order Markov chain (kMC).** We implement a simple  $k^{th}$  order Markov chain over  $k =$   
 50  $\{1, 2, 3, 4\}$ . Prior work has shown that prediction performance deteriorates on these event sequence  
 51 datasets beyond  $k = 4$  [1]. Only the results for the best performing  $k$  is shown in the tables.

52 To ensure that the model learns probabilities that are not 0 while evaluating the test set, we take  
 53 a Bayesian approach to parameter learning using a Dirichlet prior with a single hyper-parameter  
 54  $\alpha_D$ . We use the following hyper-parameter grid to choose the optimal hyper-parameter using the  
 55 train/dev sets:  $\alpha_D \in \{0.1, 1, 5, 10\}$ .

56 **Summary Markov models (BSuMM and OSuMM).** We learn binary and ordinal summary  
 57 Markov models using the score-based approach in [1]. We use the following hyper-parameter  
 58 grids to choose optimal hyper-parameters using the train/dev sets: Dirichlet hyper-parameter  
 59  $\alpha_D \in \{0.1, 1, 5, 10\}$ , look-back  $\kappa \in \{1, 3, 5, 10\}$ , complexity penalty  $\gamma \in \{0.1, 0.5, 1\}$ .

60 **Transformer for Event Sequences (TES).** We implement with Pytorch a  $B$ -block attention-based  
 61 transformer network to model the dynamics and seek to maximize the log-likelihood of event se-  
 62 quences  $\mathbf{D}$  in Equation 1:

$$\log p_{\theta}(\mathbf{D}) = \sum_{k=1}^K \sum_{i=1}^{N_k} \log p_{\theta}^*(l_i) \quad (1)$$

63 We use an un-modified history representation  $\mathbf{H}^{(B)}$  from the  $B^{th}$  block and the generated labels can  
 64 be modeled via a multinomial distribution:

$$\theta_{\psi}(l_{i+1} = m | \mathbf{H}^{(B)}(i)) = \frac{\exp(\mathbf{W}_{m,:} \mathbf{H}^{(B)}(i) + \mathbf{b}_m)}{\sum_{m=1}^M \exp(\mathbf{W}_{m,:} \mathbf{H}^{(B)}(i) + \mathbf{b}_m)} \quad (2)$$

65 where  $\mathbf{W}_{m,:}$  is the  $m^{th}$  row of the corresponding trainable weight matrix and  $\mathbf{b}_m$  is  $m^{th}$  entry of  
 66 the corresponding bias term. We perform prediction experiments and hyperparameters are selected  
 67 from the best performing model from dev set, similarly to PC-TES as shown in Table 2.

68 **Probabilistic Attention-to-Influence Neural Model (PAIN).** PAIN is an innovative model that  
 69 has been recently introduced to analyze temporal event sequences [4]. One of its key strengths is  
 70 its ability to capture intricate instance-wise interactions between events, while also uncovering the  
 71 influencers for each event type of interest. To accomplish this, PAIN leverages event sequence data  
 72 and a prior distribution on type-wise influence. Through the proposed approach, PAIN efficiently  
 73 learn an approximate posterior for type-wise influence by employing an attention-to-influence trans-  
 74 formation with variational inference. Furthermore, this method goes on to model the conditional  
 75 likelihood of sequences by sampling from the derived posterior. This sampling strategy enables the  
 76 model to selectively focus attention on the event types that have the most significant impact on the  
 77 overall sequence. A minor modification is made to make a fair comparison in our study, the origin  
 78 random **vector**  $\mathcal{V}$  is changed to a binary random **matrix**  $\mathcal{A}$  which describes the pairwise interactions  
 79 between all pairs of events, and thus the modified variational loss is:

$$\mathbb{L}(\omega, \psi; \mathbf{D}) = \mathbb{E}_{q_{\omega}} \left[ \log \frac{p(\mathcal{A})}{q_{\omega}(\mathcal{A} | \mathbf{D})} \right] + \mathbb{E}_{q_{\omega}} [\log \theta_{\psi}(\mathbf{D} | \mathcal{A})] \quad (3)$$

80 where  $p(\mathcal{A})$   $q_{\omega}(\mathcal{A} | \mathbf{D})$  are the prior and posterior parameterized by the  $\omega$  network, and  $\theta_{\psi}(\mathbf{D} | \mathcal{A})$  is  
 81 the loglikelihood term given a sampled matrix  $\mathcal{A} \sim q_{\omega}(\mathcal{A} | \mathbf{D})$ . The prior used in our experiment is  
 82  $p(\mathcal{A}) = \prod_{X,Y} p(\mathcal{A}_{XY} = 1) = 0.2$  for any  $X, Y \in \mathcal{L}$  where  $\mathcal{L}$  is the label set. Training details are  
 83 consistent with the setting described in the paper [4].

## 84 5 Synthetic Experiments with Other Causal Pairs

85 We provide additional results on synthetic experiments where we use a different set of causal pair  
 86 statements. For synthetic experiments synth-1, synth-2, we consider the causal pair  $(B, B)$  with  
 87 ground truth  $B \searrow B$  as injected knowledge. For synthetic experiments synth-3, synth-4, we con-  
 88 sider 3 additional causal pairs  $(B, B)$ ,  $(C, A)$ ,  $(B, A)$  with ground truth  $B \searrow B$ ,  $C \searrow A$  and  
 89  $B \nearrow A$  as injected knowledge, respectively. Results in Table 3 show that the overall knowledge in-  
 90 jection via our approached significantly boosts predictive performance in all cases. Yet different sets  
 91 of causal pair statements may enhance differently partial due to the optimization trajectory which  
 92 we will explore in the future.

Table 3: Next event prediction loglikelihood on 4 synthetic datasets. Italics indicates improvement over TES; bold indicates the best performance.

| Dataset | BSuMM         | OSuMM           | kMC           | PAIN           | TES           | PC-TES ( $C \nearrow B$ ) | ( $B \nearrow A$ )   | ( $C \searrow A$ )   | ( $B \searrow B$ )   |
|---------|---------------|-----------------|---------------|----------------|---------------|---------------------------|----------------------|----------------------|----------------------|
| Synth-1 | -382.82(4.67) | -373.85(6.37)   | -364.60(6.47) | -141.06(5.11)  | -107.81(2.85) | <b>-107.19(3.01)</b>      | N/A                  | N/A                  | -112.04(3.60)        |
| Synth-2 | -371.13(6.36) | -370.66(5.12)   | -350.37(7.45) | -137.94(8.42)  | -114.01(2.31) | <i>-111.89(1.52)</i>      | N/A                  | N/A                  | <b>-110.78(2.15)</b> |
| Synth-3 | -358.25(7.23) | -359.678(12.30) | -378.97(5.64) | -131.20(12.79) | -119.99(2.29) | <i>-113.58(3.81)</i>      | <i>-103.02(3.35)</i> | <b>-102.87(3.45)</b> | <i>-103.02(3.36)</i> |
| Synth-4 | -363.36(6.93) | -361.82(5.45)   | -371.75(6.35) | -134.09(13.39) | -113.95(3.05) | <i>-113.15(3.66)</i>      | <i>-105.52(3.62)</i> | <b>-105.31(3.67)</b> | <i>-105.51(3.63)</i> |

## 93 6 Causal Inference Assumptions

94 Our approach builds upon the well-established potential outcomes framework [5], and its extensions  
 95 to incorporate time-varying treatments and outcomes [6]. This framework has been widely utilized  
 96 in previous studies that share a similar objective to ours in observational longitudinal studies [6, 7,  
 97 8, 9]. To identify a counterfactual outcome distribution over time, or more precisely, the average  
 98  $w$ -step-ahead potential outcome conditioned on history as defined in Definition 1 in the main text,  
 99 it is necessary to make three standard assumptions regarding the data generating mechanism. These  
 100 assumptions are crucial for establishing causal inference and enable us to estimate the potential  
 101 outcomes in the presence of time-varying treatments and outcomes. Without loss of generality we  
 102 consider  $w = 1$  for a sequence  $k$  and a causal pair  $(z, y)$ , namely the 1-step-ahead potential outcome  
 103 conditioned on history. For ease of notation, let  $Z_i$  be binary random variable -  $Z_i$  is 1 if  $l_i = z$   
 104 else is 0,  $Y_i^*$  be the outcome defined in Definition 1, namely the probability of occurrence (at least  
 105 once) of event  $Y$  in the next window  $w = 1$  at position/time  $i$ . Let  $\mathcal{H}_i$  be a random trajectory that  
 106 generates the history. Let  $Y_{i+1}^*[Z_i = 1]$  be the potential outcome under binary treatment at  $i$ .

107 **Assumption 1 (Consistency).** When a specific unit (such as a user or patient) receives a given  
 108 sequence of treatments denoted as  $l_i = z$ , it follows that the potential outcome  $Y_{i+1}^*$  under the  
 109 treatment sequence  $l_i = z$  is equal to the observed outcome. In other words, the potential outcome  
 110 aligns with the factual outcome for the patient when considering the specific condition  $l_i = z$ .

111 **Assumption 2 (Sequential Overlap).** Throughout the entire history space over time, there is  
 112 always a non-zero probability of both receiving and not receiving any treatment:  $0 < p(Z_i =$   
 113  $1 | \mathcal{H}_{i-1} = h_{i-1}) < 1$  for all  $i \in \{1, \dots, N_k\}$  for some realization of history  $h_{i-1}$ .

114 **Assumption 3 (Sequential Ignorability).** Conditioned on the observed history, the current treat-  
 115 ment is independent of the potential outcome:  $Z_i \perp Y_{i+1}^*[Z_i] | \mathcal{H}_{i-1}$  for all  $i \in \{1, \dots, N_k\}$ . This  
 116 independence implies that there are no unobserved confounding factors that simultaneously influ-  
 117 ence both the occurrence of the outcome  $Y_i$  and the treatment assignment  $Z_i$ .

## 118 References

- 119 [1] Debarun Bhattacharjya, Saurabh Sihag, Oktie Hassanzadeh, and Liza Bialik. Summary Markov  
 120 models for event sequences. In *Proceedings of the International Joint Conference on Artificial*  
 121 *Intelligence*, pages 4836–4842, 2022.
- 122 [2] Xiao Shou, Tian Gao, Shankar Subramaniam, Debarun Bhattacharjya, and Kristin Bennett. Con-  
 123 current multi-label prediction in event streams. In *AAAI Conference on Artificial Intelligence*,  
 124 2023.
- 125 [3] Simiao Zuo, Haoming Jiang, Zichong Li, Tuo Zhao, and Hongyuan Zha. Transformer Hawkes  
 126 process. In *International Conference on Machine Learning*, pages 11692–11702. PMLR, 2020.
- 127 [4] Xiao Shou, Debarun Bhattacharjya, Tian Gao, Dharmashankar Subramaniam, Oktie Hassan-  
 128 zadeh, and Kristin P. Bennett. Probabilistic attention-to-influence neural models for event se-  
 129 quences. In *Proceedings of the International Conference on Machine Learning (ICML)*, 2023.
- 130 [5] Donald B Rubin. Bayesian inference for causal effects: The role of randomization. *The Annals*  
 131 *of Statistics*, pages 34–58, 1978.
- 132 [6] James M Robins and Miguel A Hernán. Estimation of the causal effects of time-varying expo-  
 133 sures. *Longitudinal Data Analysis*, 553:599, 2009.

- 134 [7] Bryan Lim. Forecasting treatment responses over time using recurrent marginal structural net-  
135 works. *Advances in neural information processing systems*, 31, 2018.
- 136 [8] Ioana Bica, Ahmed M Alaa, James Jordon, and Mihaela van der Schaar. Estimating coun-  
137 terfactual treatment outcomes over time through adversarially balanced representations. *arXiv*  
138 *preprint arXiv:2002.04083*, 2020.
- 139 [9] Valentyn Melnychuk, Dennis Frauen, and Stefan Feuerriegel. Causal transformer for estimating  
140 counterfactual outcomes. In *International Conference on Machine Learning*, pages 15293–  
141 15329. PMLR, 2022.
